# Supplementary material for: NFAT isoforms play distinct roles in TNFα-induced retinal leukostasis
Source: PubMed Central journal article supplement (PMC4630625; doi:10.1038/srep14963), 2015-11-03
Supplement: srep14963-s1.pdf [file srep14963-s1.pdf]

## **NFAT isoforms play distinct roles in TNF $\alpha$ -induced retinal leukostasis**

Colin A. Bretz, PhD, Sara R. Savage, Megan E. Capozzi, Sandra Suarez, and John S. Penn, PhD

## Supplemental Figure 1.

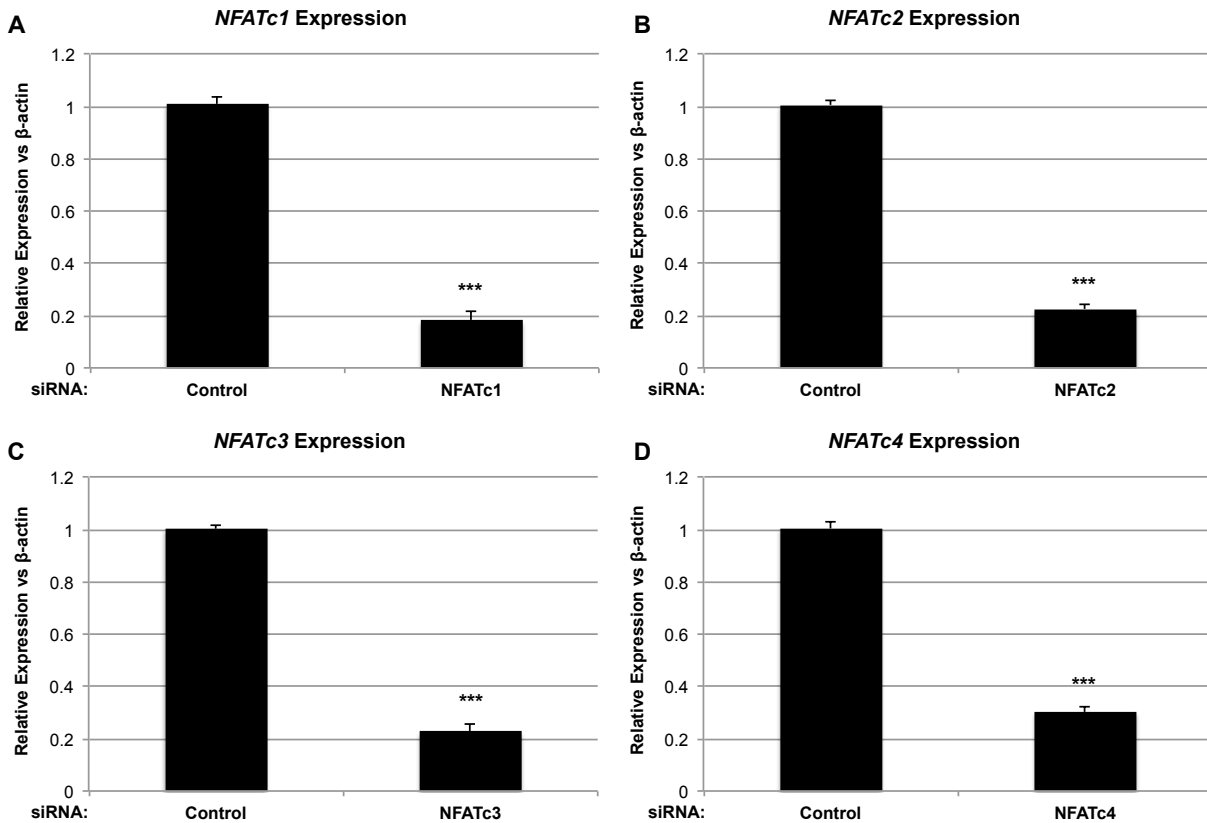

**Supplemental Figure 1. The effect of NFAT isoform-specific siRNA on NFAT isoform expression in HRMEC.** HRMEC were transfected with either control or NFAT isoform-specific siRNA, total RNA was collected and expression of NFAT isoforms was analyzed using qRT-PCR. **A) *NFATc1* Expression.** Transfection with *NFATc1* siRNA inhibited *NFATc1* expression by 82.0%. **B) *NFATc2* Expression.** Transfection with *NFATc2* siRNA inhibited *NFATc2* expression by 77.6%. **C) *NFATc3* Expression.** *NFATc3* siRNA inhibited *NFATc3* expression by 77.3%. **D) *NFATc4* Expression.** *NFATc4* siRNA inhibited *NFATc4* expression by 70.1%. Each bar represents the mean  $\pm$  SEM (n=9). \*\*\* = p<0.0001
